# Supplementary material
Source: publisher site journal article supplement (https://www.spandidos-publications.com/6026/downloadSupplementary)
Supplement: Supplementary file 1 [file downloadSupplementary]

## Sheet: Tabelle1
Supplementary Table I: qPCR- and ChIP-Primer
Gene	Forward	Reverse	Application
EPCAM	GCTGGAATTGTTGTGCTGGTTA	AAGATGTCTTCGTCCCACGC	qPCR
ELF3	GACCTACGAGAAGCTGAGCC	TCGAGTGGTCCGTGAGTTTG	qPCR
KLF5	GTTCTCTCGCGGAGGTCG	TCTTCCACACGTAAACGCCA	qPCR
VIM	GGCGAGGAGAGCAGGATTTC	TGGGTATCAACCAGAGGGAGT	qPCR
ZEB1	GCGGCGCAATAACGTTACAAA	TGGTCTGTTGGCAGGTCATC	qPCR
JUN	GAGCTGGAGCGCCTGATAAT	CCCTCCTGCTCATCTGTCAC	qPCR
EP300	TGGCAGAAAGTTGGAGTTCTCTC	AAGAAACGCTCTCCCCTTGG	qPCR
CREBBP	GTACCATTCCTCGCGATGCT	ATCAACGAAAGGTTCGGGGT	qPCR
BRD4	TCCCCGCTTATGATACATTCCC	ACGCAGCTCCTGTTTCTTAGG	qPCR
SMARCA4	ACTACGAGCTCATCCGCAAG	GGAGTCTTCATAGATCAGGGAGC	qPCR
SLC29A1	TGAGCGGAACTCTCTCAGTG	TGAGGTAGGTGAATAACAGCAGG	qPCR
TBP	ACTCCACTGTATCCCTCCCC	CAGCAAACCGCTTGGGATTA	qPCR
EPCAM	TTCGGGCTTCTGCTTGCC	CCCTCCCTATTATGCCCGTT	ChIP
ELF3	CCCTTCCTCTAACAGCCGTG	AGCTCAGGATACCCACGCTA	ChIP
SLC29A1	TGAGCAGCGGGTGTGTAAAT	AAGGCTGTCTGTCCATCGTG	ChIP
VIM	CCCCAAGGTCAATTGCACGA	CACAGTACAGGGTTCACGGT.	ChIP
